# Supplementary material for: Combination of paclitaxel with rosiglitazone induces synergistic cytotoxic effects in ovarian cancer cells
Source: PubMed Central journal article supplement — Sci Rep. 2024 Dec 28;14:30672. doi: 10.1038/s41598-024-74277-9 (PMC11680578; doi:10.1038/s41598-024-74277-9), 2024-12-28
Supplement: 41598_2024_74277_MOESM1_ESM.pdf [file 41598_2024_74277_MOESM1_ESM.pdf]

# PPAR $\alpha$

We have not  
used last two  
lines

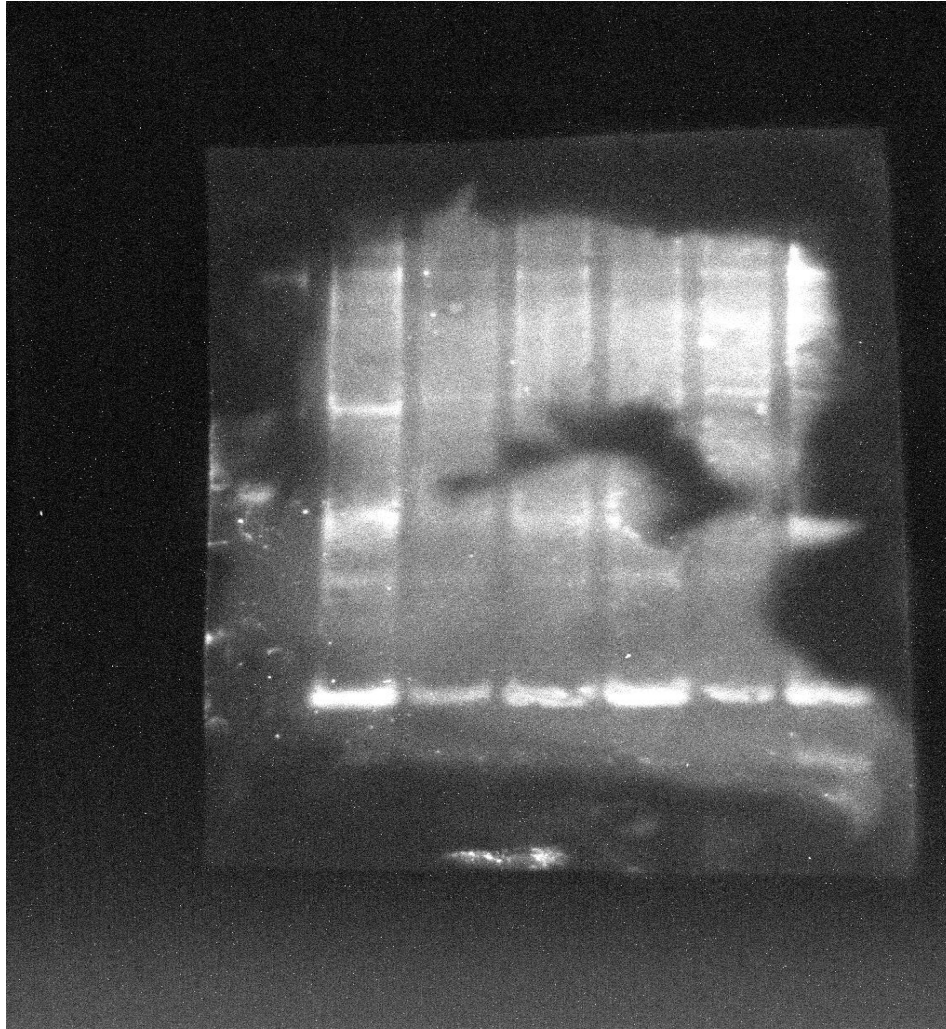

Control

1nMPTX

0.5µMol RGZ

1nM  
PTX+0.5µMol  
RGZ

# $\beta$ actin

We have not  
used last two  
lines

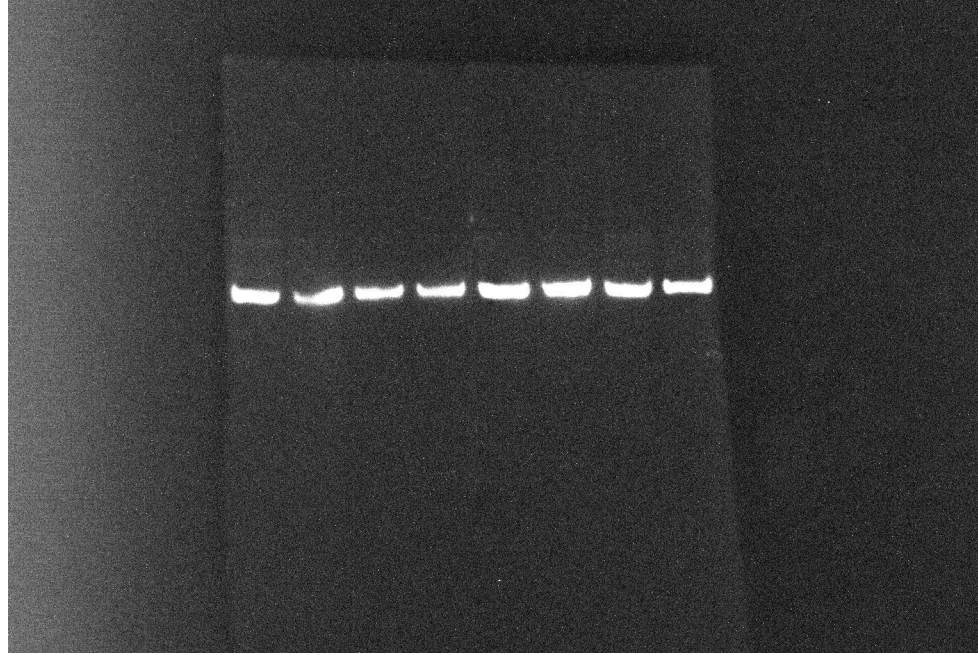

Control

1nM PTX

0.5 $\mu$ Mol RGZ

1nM PTX+0.5 $\mu$  Mol  
RGZ

# PPAR $\gamma$

We have not  
used last two  
lines

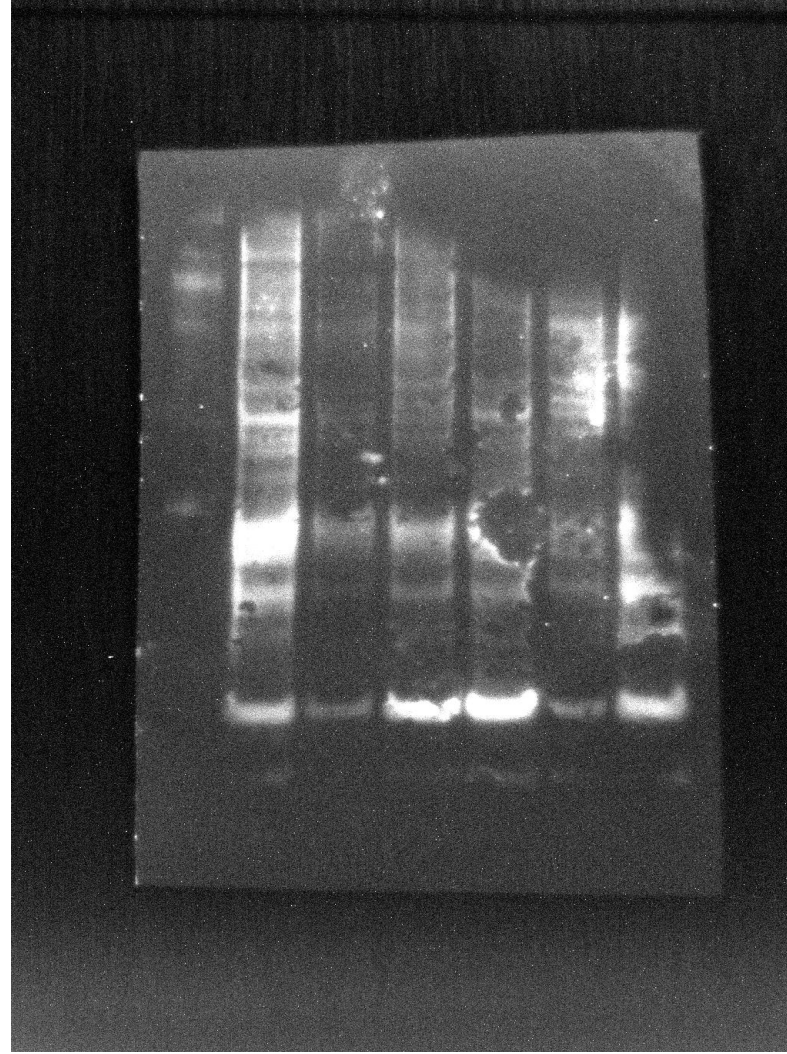

Control

1nM PTX

0.5μMol RGZ

1nM

PTX+0.5μMol  
RGZ
